# Supplementary material for: Irradiation stability and induced ferromagnetism in a nanocrystalline CoCrCuFeNi highly-concentrated alloy
Source: Royal Society of Chemistry journal article supplement (doi:10.1039/d1nr04915a), 2021-01-01
Supplement: d1nr04915a1.pdf [file d1nr04915a1.pdf]

## Supplemental Information for: Irradiation stability and induced ferromagnetism in a nanocrystalline CoCrCuFeNi highly-concentrated alloy

Matheus A. Tunes<sup>a,\*</sup>, Graeme Greaves<sup>b</sup>, Phillip D. Rack<sup>c,d</sup>, Walker L. Boldman<sup>d</sup>, Cláudio G. Schön<sup>e</sup>, Stefan Pogatscher<sup>f</sup>, Stuart A. Maloy<sup>a</sup>, Yanwen Zhang<sup>d,g</sup>, Osman El-Atwani<sup>a</sup>

<sup>a</sup>Materials Science and Technology Division, Los Alamos National Laboratory, United States

<sup>b</sup>School of Computing and Engineering, University of Huddersfield, United Kingdom

<sup>c</sup>Joint Staff Center of Nanophase Materials Sciences, Oak Ridge National Laboratory, United States

<sup>d</sup>Materials Science and Engineering Department, University of Tennessee, United States

<sup>e</sup>Department of Metallurgical and Materials Engineering, Polytechnic School, University of São Paulo, Brazil

<sup>f</sup>Chair of Nonferrous Metallurgy, Montanuniversitaet Leoben, Austria

<sup>g</sup>Materials Science and Technology Division, Oak Ridge National Laboratory, United States

### Abstract

This supplementary information file contains the results from the SRIM-2013Pro calculations for fluence-to-dpa conversion

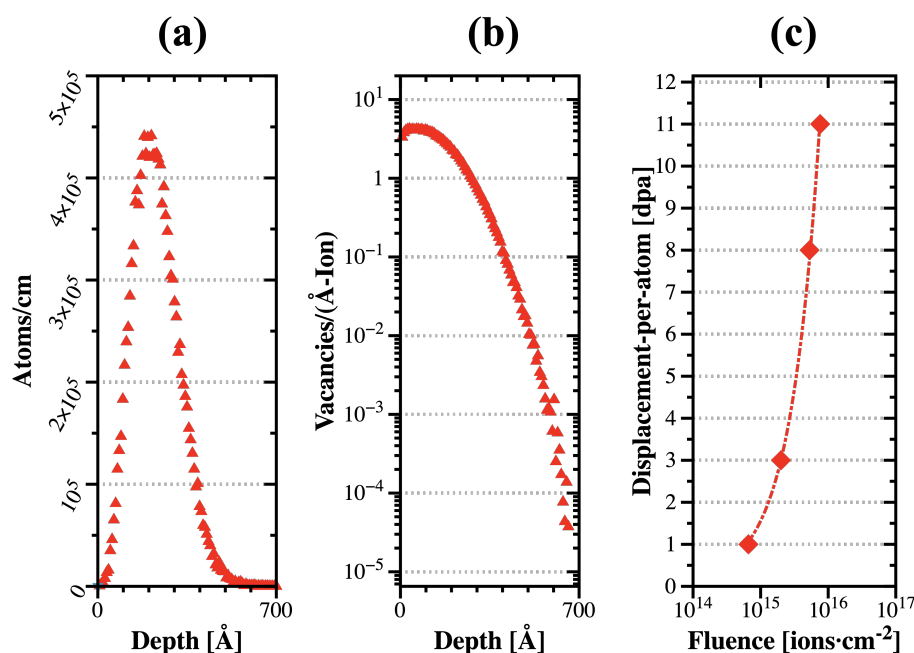

**Figure 1** SRIM calculations and fluence-to-dpa conversion. Plot in (a) shows the implantation profile for 300 keV Xe ions into the CoCrCuFeNi highly-concentrated alloy. The plots in (b) and (c) show, respectively, the number of vacancies per Å and ion collision and the fluence-to-dpa conversion for the irradiation experimental setup used in this work.

\*Corresponding author:

Email address: tunes@lanl.gov (Matheus A. Tunes)

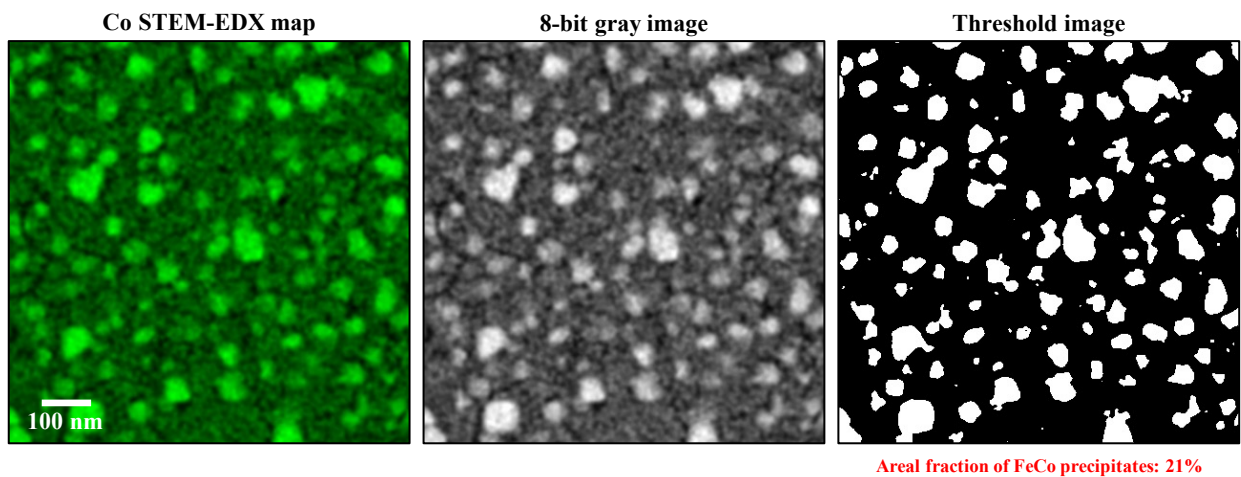

**Figure 2 Areal fraction estimation of FeCo precipitates** | By using the Co STEM-EDX map, we have used the threshold image method within ImageJ. The areal fraction of FeCo precipitates within the CoCrCuFeNi nanocrystalline HCA after thermal annealing is approximately 21%.
